# Supplementary material for: Pressurized Hot Water Extraction and Capillary Electrophoresis for Green and Fast Analysis of Useful Metabolites in Plants
Source: MDPI journal article supplement (doi:10.3390/molecules24132349), 2019-06-26
Supplement: s1 [file s1]

## Supplementary Information (SI)

### **Pressurized hot water extraction and capillary electrophoresis for green and fast analysis of useful metabolites in plants**

Kurt Debruille<sup>1,2</sup>, Jason Smith<sup>3</sup>, and Joselito P. Quirino<sup>1,\*</sup>

<sup>1</sup>Australian Centre for Research on Separation Science (ACROSS), School of Natural Sciences-Chemistry, University of Tasmania, Private Bag 75, Hobart, Tasmania 7001, Australia

<sup>2</sup>Department of Chemistry, Faculty of Science, University of Mons, 20 Place du Parc, Mons 7000, Belgium

<sup>3</sup>School of Natural Sciences-Chemistry, University of Tasmania, Private Bag 75, Hobart, Tasmania 7001, Australia

\* corresponding author: [jquirino@utas.edu.au](mailto:jquirino@utas.edu.au)

Table S1. Quantities of plant sample extracted by PHWE. (page 2)

Table S2. Concentration range, linearity, and repeatability of the CE methods for the analysis of the targeted metabolites. (page 3)

Figure S1. MEKC profiles of the successive PHWE extracts 1, 2, and 3 (E1, E2, and E3, respectively) using 20, 30, and 35% EtOH of *Tasmannia lanceolata* leaf. (page 4)

Table S1. Quantities of plant sample extracted by PHWE

| Sample (dried)                            | quantities<br>(g $\pm$ 0.01 g) | targeted<br>metabolite/s       |
|-------------------------------------------|--------------------------------|--------------------------------|
| <i>Tasmannia lanceolata</i> (leaf)        | 15                             | polygodial                     |
| <i>Cinnamomum cassia</i> (bark)           | 20                             | cinnamaldehyde<br>and coumarin |
| <i>Illicium verum</i> (fruit and seed)    | 20                             | shikimic acid                  |
| <i>Correa backhouseana</i> (leaf)         | 8                              | shikimic acid                  |
| <i>Tasmannia lanceolata</i> (pepperberry) | 18.3                           | shikimic acid                  |
| <i>Tasmannia lanceolata</i> (leaf)        | 20                             | shikimic acid                  |
| <i>Backhousia citriodora</i> (leaf)       | 13.4                           | shikimic acid                  |
| <i>Dodonea viscosa</i> (leaf)             | 8.4                            | shikimic acid                  |
| <i>Glycyrrhiza glabra</i> (root)          | 15                             | shikimic acid                  |

Table S2. Concentration range, linearity, and repeatability of the CE methods for the analysis of the targeted metabolites.

|                | linear range<br>( $\mu\text{g/mL}$ )                 | linear equation<br>$y = ax + b$ | linearity ( $R^2$ )<br>corrected peak<br>area        | LOD<br>( $\mu\text{g/mL}$ ) |
|----------------|------------------------------------------------------|---------------------------------|------------------------------------------------------|-----------------------------|
| polygodial     | 10 - 250                                             | $y = 0.048x + 0.722$            | 0.990                                                | 3                           |
| shikimic acid  | 5 - 100                                              | $y = 0.254x + 6.534$            | 0.996                                                | 2                           |
| cinnamaldehyde | 1 - 100                                              | $y = 0.129x - 0.012$            | 0.997                                                | 0.3                         |
| coumarin       | 1 - 50                                               | $y = 0.062x + 0.142$            | 0.998                                                | 2                           |
|                | intraday %RSD (n=8)<br>migration / retention<br>time |                                 | interday %RSD (n=8)<br>migration /<br>retention time |                             |
|                |                                                      | corrected<br>peak area          |                                                      | corrected<br>peak area      |
| polygodial     | 1.3                                                  | 13.2                            | 3.5                                                  | 10.5                        |
| shikimic acid  | 0.7                                                  | 8.9                             | 0.6                                                  | 8.6                         |
| cinnamaldehyde | 2.3                                                  | 4.2                             | 2.3                                                  | 5.6                         |
| coumarin       | 0.9                                                  | 1.7                             | 1.8                                                  | 10.3                        |

MEKC and CZE methods are described in the main text.

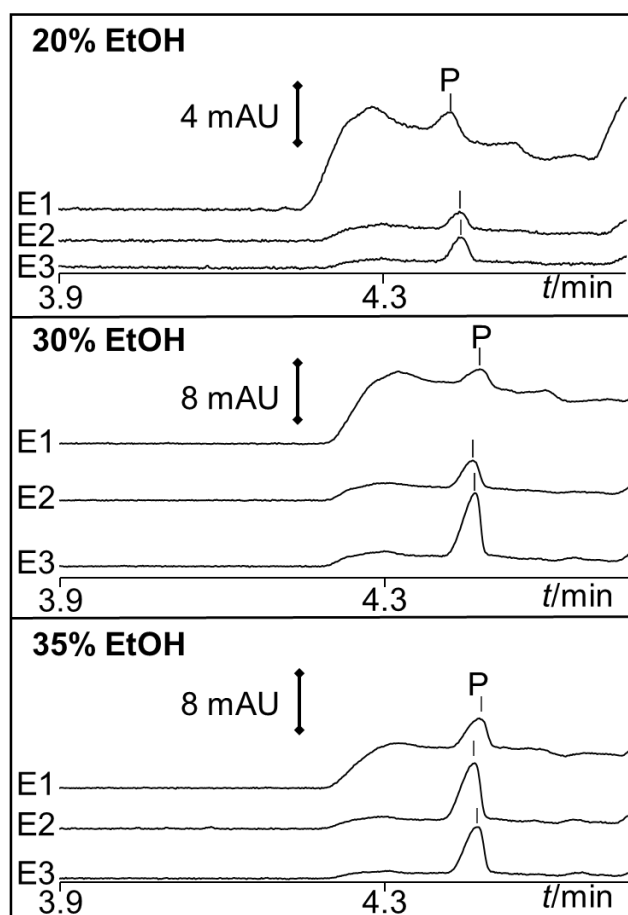

Figure S1. MEKC profiles of the successive PHWE extracts 1, 2, and 3 (E1, E2, and E3, respectively) using 20, 30, and 35% EtOH of *Tasmannia lanceolata* leaf. The intensity of the baseline shift that started <4.3 min was highest with the first extract (E1) using all extraction solutions. The intensity of polygodial peak was higher in the second and third extracts using  $\geq 30\%$  EtOH, indicating the improved extraction of polygodial after the first extraction using higher concentrations of EtOH. Analysis was by MEKC as described in the Materials and methods section.
